29 **# CORRESPONDING AUTHOR**

30 **Email:** [philippa.matthews@ndm.ox.ac.uk](mailto:philippa.matthews@ndm.ox.ac.uk)

31 **Address:** Medawar Building for Pathogen Research, South Parks Road, Oxford OX1

32 3SY, UK

33 **Telephone:** 0044 1865 271973

34

35 **KEY WORDS:** HBV, HBsAg, HBeAg, surface antigen, clearance, cure, dynamics, treatment,

36 prognosis, monitoring, biomarkers

37

38 **WORD COUNT:**

39

40 **CONFLICT OF INTEREST:**

41

42 **FINANCIAL SUPPORT:**

43 PCM is funded by the Wellcome Trust, grant number 110110. EB is funded by the Medical

44 Research Council UK, the Oxford NIHR Biomedical Research Centre and is an NIHR Senior

45 Investigator. The views expressed in this article are those of the authors and not necessarily those

46 of the NHS, the NIHR, or the Department of Health. □

47

48 **AUTHORS' CONTRIBUTIONS:**

49 • Conceived the study: KJ, EB, PCM

50 • Assimilated/analysed clinical records: LD, SL, JM, MP, SC, KJ

51 • Established the BRC informatics working group: KC

52 • Developed the health informatics (HIC) pipeline: DS, HS, JD, OF, KV, KW

53 • Analysed the data: DS, ALM, MAA, SL, JM, PCM

54 • Literature review: LD, JM

55 • Wrote the manuscript: LD, DS, PCM

56 • Edited and approved the final manuscript: all authors

57

58 **ACKNOWLEDGEMENTS**

59 This work has been facilitated by infrastructure development at Oxford Biomedical Research  
60 Centre (BRC) funded by the NIHR Health Informatics Collaborative (HIC).

61 An earlier version of this dataset was presented as a poster at the EASL International Liver  
62 Congress meeting, Paris 2018 (<https://f1000research.com/posters/7-917>).

63 .

64 **ABBREVIATIONS**

|    |                  |                                          |
|----|------------------|------------------------------------------|
| 65 | CHB              | Chronic Hepatitis B virus infection      |
| 66 | EPR              | Electronic patient record                |
| 67 | HBeAg            | Hepatitis B 'e' antigen                  |
| 68 | HBsAg            | Hepatitis B surface antigen              |
| 69 | HBV              | Hepatitis B virus                        |
| 70 | HCV              | Hepatitis C virus                        |
| 71 | HIC              | Health Informatics Collaborative         |
| 72 | HIV              | Human immunodeficiency virus             |
| 73 | LFT              | Liver function tests                     |
| 74 | LIMS             | Laboratory information management system |
| 75 | NA               | Nucleos(t)ide analogues                  |
| 76 | NIHR             | National Institute for Health Research   |
| 77 | PEG-IFN $\alpha$ | Pegylated interferon alpha 2             |
| 78 | TDF              | Tenofovir Disoproxil Fumarate            |
| 79 | RBV              | Ribavirin                                |

80

81

82 **ABSTRACT**

83 HBsAg and HBeAg have gained traction as biomarkers of control and clearance during monitoring  
84 of chronic hepatitis B virus infection (CHB). An improved understanding of the correlates of  
85 clearance of these proteins could help inform improvements in patient-stratified care and advance  
86 insights into the underlying mechanisms of disease control, thus underpinning new cure strategies.  
87 We collected electronic clinical data via an electronic pipeline supported by the National Institute  
88 for Health Research Health Informatics Collaborative (NIHR-HIC), adopting an unbiased approach  
89 to generating a robust longitudinal dataset for adults testing HBsAg-positive from a large UK  
90 teaching hospital over a six year period (2011-2016 inclusive). From 553 individuals with CHB,  
91 longitudinal data were available for 319, representing >107,000 weeks of clinical follow-up. Among  
92 these 319 individuals, 13 (4%) cleared HBsAg completely. HBsAg clearance rate was similar in  
93 individuals on NA therapy (n=4, median clearance time 150 weeks) vs those not on NA therapy  
94 (n=9, median clearance time 157 weeks). Those who cleared HBsAg were significantly older, and  
95 less likely to be on NA therapy compared to non-clearers ( $p=0.003$  and  $p=0.001$ , respectively).  
96 Chinese ethnicity was associated with HBeAg positivity ( $p=0.025$ ). HBeAg clearance occurred both  
97 on NA therapy (n=24, median time 49 weeks) and off NA therapy (n=19, median time 52 weeks).  
98 Improved insights into the dynamics of these biomarkers can underpin better prognostication and  
99 patient-stratified care. Our systematised approach to data collection paves the way for scaling up  
100 efforts to harness clinical data to address research questions and underpin improvements in  
101 clinical care provision.

102

103 **IMPORTANCE**

104 Advances in the diagnosis, monitoring and treatment of hepatitis B virus (HBV) infection are  
105 urgently required if we are to meet international targets for elimination by the year 2030. Here we  
106 demonstrate how routine clinical data can be harnessed through an unbiased electronic pipeline,  
107 showcasing the significant potential for amassing large clinical datasets that can help to inform  
108 advances in patient care, and provide clues that inform new cure strategies. Our cohort from a  
109 large UK hospital includes adults from diverse ethnic groups that have previously been under-  
110 represented in the literature. Tracking two protein biomarkers that are used to monitor chronic HBV

- 111 infection, we provide new insights into the timelines of HBV clearance, both on and off treatment.
- 112 These results contribute to improvements in individualised clinical care and may provide important
- 113 clues into the immune events that underpin disease control.

## 114 INTRODUCTION

115 Progression of HBV infection and treatment response is most commonly monitored by  
116 quantification of HBV DNA viral load (1). However, viral load measurement is expensive, not  
117 universally available; viral DNA levels can fluctuate over time, and quantification can be inaccurate  
118 at low levels. Reproducible, automated quantification of other biomarkers such as hepatitis B  
119 surface antigen (HBsAg) and/or e-antigen (HBeAg) are therefore attractive biomarkers for use  
120 instead of, or alongside, HBV DNA monitoring.

121

122 Both HBeAg and HBsAg are produced from HBV cccDNA which becomes established as an  
123 intranuclear 'mini-chromosome' (Fig 1A). Two different pathways can lead to the disappearance of  
124 HBV DNA from serum. First, inhibition of viral reverse transcriptase, through use of nucleos(t)ide  
125 analogues (NA's) such as entecavir, tenofovir or lamivudine, prevents synthesis of new HBV DNA.  
126 This approach does not have a major influence on HBsAg, which continues to be produced from  
127 the cccDNA reservoir (Fig 1B). Second, immune responses (either arising naturally or driven by  
128 immunotherapies, including interferon) can eliminate infected hepatocytes, removing cccDNA from  
129 the liver, and thereby eliminating HBsAg and HBV DNA from the circulation. This pattern occurs  
130 independent of NA therapy, and can lead to the complete elimination of HBV infection ('sterilising  
131 cure'), or to cccDNA suppression to the extent that neither HBsAg nor HBV DNA can be detected  
132 in the serum ('functional cure') (Fig 1C). Sterilising and functional cure cannot be distinguished  
133 clinically, but the difference is important because there is a risk of reactivation following functional  
134 cure that does not exist with sterilising cure.

135

136 HBsAg levels are typically highest in the earlier phases of infection and in HBeAg-positive  
137 individuals, frequently correlate with HBV DNA levels in chronic hepatitis B (CHB) infection, and  
138 are associated with risk of subsequent reactivation (2). HBsAg is a quantifiable risk factor for  
139 development of hepatocellular carcinoma (HCC) and chronic liver disease (3), although the  
140 relationship is not well defined: in some studies, higher HBsAg levels are associated with lower  
141 levels of fibrosis (4–6), while in others, lower baseline HBsAg levels are associated with reduced  
142 risk of both cirrhosis and HCC (7). HBsAg levels have also been used to classify individuals into

143 those with inactive carriage (together with HBV DNA <2000 IU/ml and normal ALT (8, 9)) versus  
144 active CHB (associated with higher viral loads and the attendant risks of inflammatory liver  
145 disease, fibrosis and cirrhosis (10–13)). HBsAg elimination is widely regarded as a marker of  
146 immunological clearance ('functional cure').

147

148 HBeAg-positivity is associated with high viral loads and is therefore a marker of infectivity. Loss of  
149 HBeAg is usually associated with production of anti-HBe antibody (a marker of immune-mediated  
150 control), and typically associated with lower viral loads. However, although these broad patterns  
151 have been described, further efforts are required to elucidate and interpret the dynamics of HBsAg  
152 and HBeAg, with the potential to develop insights into the timing and patterns of immunological  
153 clearance, and to improve patient-stratified clinical management.

154

155 We identified nine studies reporting an annual or cumulative HBsAg clearance rate (summarised in  
156 Suppl Table 1). Notably, eight of these were in Asian populations (14–21), with the remaining one  
157 based in New Zealand (22). The reported clearance rate of HBsAg ranged from 0.15% per year  
158 (20) to 2.7% per year (17) with a maximum cumulative clearance of 3.5% (14). Older age was  
159 associated with clearance in two cohorts (16, 22). The role of treatment in clearance is  
160 inconsistent, with nucleos(t)ide analogue (NA) treatment associated with clearance in some  
161 cohorts (14, 18) but not in others (19).

162

163 HBsAg levels can be used to determine treatment response, although this has been more reliably  
164 reported for PEG-IFN2 $\alpha$  treatment than for NAs (23, 24), as it implies reduction or removal of the  
165 cccDNA reservoir (Fig 1C). Current UK guidelines recommend quantitative HBsAg and HBeAg  
166 measurement before starting treatment and at weeks 12, 24 and 48 during treatment, followed by  
167 6 monthly measurement during long term therapy (25). European Association for the Study of the  
168 Liver (EASL) guidelines recommend quantitative HBsAg measurement annually in treated patients  
169 if HBV DNA is undetectable, as well as using HBsAg levels to inform the decision to stop treatment  
170 (1). EASL guidelines also recommend HBeAg measurement as part of the initial clinical

171 assessment, and list HBeAg loss as one of the serological responses to treatment, but do not  
172 specify a frequency for follow-up testing (1).

173

174 International targets arising from the United Nations 'sustainable development goals' have set a  
175 challenge for elimination of HBV infection as a public health threat by the year 2030 (26).

176 Recognising the multi-lateral approaches that will be required to reach this ambitious goal, we here  
177 focus on two inter-related aims:

178 i. We set out to showcase how longitudinal data for HBV-infected individuals can be collected  
179 through an unbiased electronic pipeline that collates, cleans and anonymises routinely-  
180 collected electronic clinical data, in this case driven by infrastructure supported by the UK  
181 National Institutes of Health Research (NIHR) Health Informatics Collaborative (HIC);  
182 ([www.hic.nihr.ac.uk](http://www.hic.nihr.ac.uk)). The aim is to harness clinical data to drive research and quality  
183 improvements in diagnostics, monitoring and therapy of viral hepatitis, and to underpin new  
184 questions for basic science. Through developing and testing this system, we have devised  
185 an approach that can be rolled-out to incorporate other centres, with substantial gains  
186 predicted through the power of large datasets.

187 ii. We analysed data for HBV sourced from a tertiary referral UK teaching hospital, in order to  
188 develop better insights into patterns of HBsAg and HBeAg clearance. Through the  
189 application of an unbiased approach (agnostic to treatment, clinical stage of disease, other  
190 biomarkers, or genotype of infection), we aim to develop a clear picture of the dynamics of  
191 clearance. Identifying demographic or clinical characteristics that predict specific disease  
192 outcomes, provides opportunity for the investigation of immunological correlates of control  
193 and clearance.

194 Collectively, this enterprise provides proof-of-principle for the systematic use of electronic clinical  
195 data in informing studies of viral hepatitis, as well as shedding new light on the dynamics of  
196 clearance of HBsAg and HBeAg.

197

## 198 **RESULTS**

### 199 ***Description of a clinical cohort of chronic HBV infection***



200 We identified 553 individuals who tested HBsAg-positive during the six-year period 2011-2016,  
201 inclusive. Of these, 319 met inclusion criteria for further analysis (as shown in Table 1; Fig 2).  
202 Characteristics of the cohort are summarised in Table 2 and the complete metadata for these 319  
203 CHB patients is available as a supporting data file (Suppl Table 2). We collected longitudinal data  
204 for a total of 107,702 person-weeks (range 61-702 weeks, mean 338 weeks (6.5 years) of follow-  
205 up per individual, IQR 174-487). The median age at first HBsAg test was 34 years (IQR 29 - 43,  
206 range 10 – 71), and males accounted for 191/319 (60%) of cases. HIV co-infection was  
207 documented in 9 individuals (2.8%), although we cannot exclude the possibility that the true  
208 prevalence of HIV-coinfection was higher due to a proportion of individuals who did not have a  
209 recent HIV test result.

210

### 211 ***Frequency of HBsAg clearance***

212 Exemplar patterns of HBsAg clearance are illustrated in Fig 3 (as per definitions in Table 1). Using  
213 the most stringent definition of HBsAg clearance, we documented complete clearance in 13/319  
214 (4.1%) individuals (for full details see Suppl Table 2 and clearance trajectories shown in Suppl Fig  
215 1). The HBsAg clearance rate for this cohort was 0.6% per year. In only 2/13 cases could we  
216 estimate the likely duration of infection prior to clearance, one individual who had been vertically  
217 infected (HBS-145) and one with iatrogenic infection related to a blood transfusion in childhood  
218 (HBS-113). These individuals were both infected for approximately 25 years before clearing  
219 HBsAg.

220

221 We classified an additional 27/319 (8.5%) individuals as ‘potential clearers’ on the grounds of  
222 HBsAg trends consistently declining towards clearance (criteria in Table 1; clearance curves  
223 shown in Suppl Fig 2). These represent a more heterogenous group, but the clearance trajectory in  
224 all cases suggests that they would meet the more stringent clearance criteria if prospective  
225 surveillance were to be continued. In contrast, HBsAg curves for non-clearers are shown in Suppl  
226 Fig 3.

227

### 228 ***Characteristics of individuals with HBsAg clearance or potential clearance***

229 Adults classified as completely or potentially clearing HBsAg were significantly older than non-  
230 clearers (median age 40 vs 34 years;  $p=0.003$ ; Table 2; Suppl Fig 4). There was no difference in  
231 sex or ethnic origin between individuals in different HBsAg clearance categories (Table 2). The  
232 majority of those who completely cleared HBsAg were HBeAg-negative throughout the period of  
233 observation (10/13, 77%). Among the remaining three with detectable HBeAg, two of these lost  
234 HBeAg prior to clearing HBsAg (HBS-197 and HBS-223), while one (HBS-195) cleared HBsAg and  
235 HBeAg together (Suppl Fig 1). In three cases (HBS-113, HBS-145 and HBS-195), HBV DNA was  
236 cleared at the same time as HBsAg; however, in the other ten individuals (77% of clearers), HBV  
237 DNA levels were low ( $<100$  IU/ml) throughout the period of HBsAg clearance.

238

### 239 ***Rate of HBsAg clearance***

240 HBsAg clearance occurred over a median time of 157 weeks (95% CI 90-239 weeks) (Fig 4A).  
241 Comparing individuals on treatment ( $n=4$ ) vs. off treatment ( $n=9$ ) during or in the 12 months prior to  
242 HBsAg clearance, clearance occurred over similar time frames (median 150 weeks in those on  
243 treatment vs. 157 weeks in those not on treatment; Fig 4B). Among 279 HBsAg ‘non-clearers’,  
244 246/279 (88%) had HBsAg levels that were persistently  $>1000$  IU/ml. The remaining 12% had  
245 more heterogenous HBsAg dynamics, including transient dips  $<1000$  IU/ml (e.g. HBS-298) and  
246 sustained levels  $<1000$  IU/ml but without a trend towards clearance (e.g. HBS-368).

247

### 248 ***Treatment status of different groups***

249 During the HBsAg clearance phase, or in the 12 months prior, 4/13 (31%) individuals defined as  
250 having completely cleared HBsAg were on NA therapy (Fig 4B,C). These individuals had received  
251 treatment for a median of 13 months (range 2 months – 8 years) prior to clearance. The other nine  
252 (69%) were not on treatment in the 12 months prior to HBsAg clearance, but one had received  
253 PEG-IFN $\alpha$  therapy 4 years earlier. In those individuals defined as ‘potential clearers’, 7/27 (26%)  
254 received NA treatment, two of whom received TDF as part of an HIV treatment regimen.

255

256 We also reviewed treatment data for the 279 individuals who did not clear HBsAg, and were able  
257 to retrieve data for 171 of these (61%). Among these, 131 (77%) had received treatment of some

258 type, and 40 had never been treated (23%). We were not able to determine robust time-frames for  
259 most treatment episodes. Based on these data, non-HBsAg clearers were statistically more likely  
260 to be on treatment than HBsAg clearers (131/171, vs 4/13 respectively,  $p=0.001$  by Fisher's Exact  
261 test). This may reflect inherently better immune control in the group who clear HBsAg, meaning  
262 they are less likely to meet criteria for treatment than non-clearers. However, these data must be  
263 interpreted with caution, as bias is introduced as a result of missing data among the non-clearers,  
264 and by different time-lines for follow-up (we assessed treatment cross-sectionally in clearers based  
265 on a specific time of HBsAg loss, for which there is no equivalent among non-clearers, thus we  
266 may have assessed longer follow-up times in the latter group).

267

### 268 ***HBeAg status***

269 HBeAg was detectable in 81/319 (25%) of individuals at the start of the observed time period.  
270 Among these, 51/81 (63%) were male and the median age was 34. By multivariate analysis,  
271 Chinese ethnicity was associated with HBeAg-positive status, with 22/56 (39%) of Chinese  
272 individuals being HBeAg-positive ( $p=0.025$ ). We documented HBeAg clearance in 44/81 (54%) of  
273 these individuals over the observed time period (Table 3). HBeAg loss occurred over a median  
274 period of 54 weeks (95% CI 38-66 weeks) between last positive and first negative HBeAg test (Fig  
275 4D). Median clearance was 49 weeks (95% CI 29-59 weeks) for individuals who had received  
276 treatment in the year prior to the last positive HBeAg result ( $n=24$ , 55%) and 52 weeks (95% CI  
277 14-133) for untreated individuals ( $n=19$ , 43%); treatment data were not available for 1 individual  
278 (Fig 4E,F). Longitudinal data for individuals classified according to HBeAg clearance are shown in  
279 Suppl Figs 5-7. We also reviewed treatment data for those who did not clear HBeAg, and were  
280 able to retrieve data for 27 of these (73%). Of these, 24 (89%) had received some treatment whilst  
281 3 (11%) were untreated.

282

### 283 ***Association between HBsAg clearance and ALT***

284 Complete longitudinal ALT data are shown for each individual in Suppl Figs 1-3. We investigated  
285 whether there were differences in ALT according to HBsAg clearance (for each of the three HBsAg  
286 groups defined in Fig 2). There was no significant difference in ALT at the time of first test between

287 HBsAg clearers, 'potential clearers' and non-clearers (Suppl Fig 8). ALT data were available before  
288 and during HBsAg clearance for 11/13 individuals who cleared HBsAg. Among these, three  
289 individuals (HBS-162, HBS-195 and HBS-314) had a spike in ALT before clearance which returned  
290 to the normal range after HBsAg clearance. Another individual (HBS-230) also had a slightly raised  
291 ALT before HBsAg clearance, but this did not normalise after HBsAg clearance. In the 7 other  
292 cases, ALT results remained within the normal reference range for the entire period of surveillance  
293 (Suppl Fig 1).

294

### 295 ***Relationship between HBsAg and HBV DNA***

296 In 11/13 HBsAg clearers, HBV DNA was below the limit of detection (<20 IU/ml) throughout; in two  
297 cases, HBV DNA was cleared at the same time as HBsAg (Suppl Fig 1). The HBV DNA trajectory  
298 of individuals classified as potential clearers was more heterogenous (Suppl Fig 2): 10 individuals  
299 had cleared HBV DNA by the time of their last HBsAg test, 9 had negative HBV DNA results at  
300 some point but had subsequent detectable viraemia, and 8 individuals had detectable HBV DNA  
301 throughout the period of surveillance.

302

## 303 **DISCUSSION**

### 304 ***Key findings and novelty***

305 We present a diverse cohort of individuals with chronic HBV infection, showcasing a new  
306 algorithmic approach to collating a large longitudinal clinical dataset from multiple electronic  
307 sources. The HIC infrastructure provides a foundation for future initiatives that collate diverse  
308 clinical data. While this current dataset pertains to a single centre only, in the longer term, we  
309 propose to adopt this approach to unify datasets from different clinical and geographic settings,  
310 generating bigger datasets that have more power to inform both clinical practice and research.  
311 This is a powerful approach, as following the initial investment in setting up the infrastructure and  
312 software, minimal further effort is required in order to assimilate extended clinical datasets over  
313 time.

314

315 HBsAg clearance in CHB is an uncommon event, and large cohorts are therefore required to  
316 describe the characteristics of individuals who clear, and to determine the specific dynamics of  
317 serological changes. We have here plotted clearance trajectories that are likely to be generally  
318 reflective of serological clearance of both HBeAg and HBsAg over time. All previous studies that  
319 we identified describing HBsAg loss originate from Asia or Australasia (Suppl Table 1) and are  
320 therefore likely to represent HBV genotypes B and C. Undertaking this analysis in a UK-based  
321 cohort provides a more diverse mixture of host ethnicities (and by inference, diverse viral  
322 genotypes). Unlike some previous studies of HBsAg clearance that introduce bias through a focus  
323 on treatment or based on patient recall for follow-up, the approach we took is agnostic to other  
324 parameters, thereby providing a more complete picture.

325

326 Our dataset corroborates prior literature in confirming that treatment is not pre-requisite for  
327 clearance, and that either functional or sterilising cure, leading to immunological clearance of  
328 HBsAg and HBeAg can occur independent of antiviral therapy (Fig 1C) (16, 27). Due to small  
329 numbers, we did not have statistical power to determine whether there was a significant difference  
330 in the time taken to clear either HBsAg or HBeAg in individuals on treatment compared to an  
331 untreated group. However, the comparable speed of clearance on vs off treatment suggests that  
332 clearance trajectories are similar irrespective of NA treatment. We found that NA treatment was  
333 more common among non-clearers, which may genuinely reflect a higher proportion of this group  
334 meeting treatment criteria, but may also be biased by the incomplete nature of our treatment data.  
335 Further prospective studies are needed to study the relationship between clearance and treatment  
336 in more detail.

337

338 Based on the epidemiology of HBV infection in this cohort, in which a substantial proportion of  
339 individuals are likely to have been infected at birth or in early childhood, it is intriguing that HBsAg  
340 and HBeAg clearance occur apparently at random in middle adulthood. In the case of HBsAg,  
341 clearance is associated with older age as has been previously reported (16, 22). HBeAg clearance  
342 occurred over a median period of 54 weeks, substantially more quickly than HBsAg clearance  
343 which was documented over a median period of 157 weeks, perhaps indicating different underlying

344 mechanisms at play (28–30). Further studies are needed to determine the relevant immune  
345 responses that underpin this clearance, and to identify possible triggers for clearance.

346

### 347 ***Relevance of HBsAg and HBeAg for clinical practice and research***

348 While some guidelines recommend monitoring of HBsAg levels (1, 31), there is a lack of consistent  
349 understanding about how to interpret individual or longitudinal measurements. Developing better  
350 insights into the prognostic information that can be captured from this biomarker could be relevant  
351 to predicting patient outcomes and providing stratification of therapy. In this study, we did not have  
352 routine access to HBsAg levels >1000 IU/ml, but as these data progressively become available,  
353 future studies will have the opportunity to develop a better picture of HBsAg distribution across the  
354 whole range of CHB infections. Advocacy is required to provide more universal access to platforms  
355 that quantify HBsAg, and to improve clinical practice through interval measurements of HBsAg in  
356 chronically infected patients.

357

358 The picture we have developed here suggests that the majority of individuals who develop a  
359 sustained pattern of HBsAg decline below 1000 IU/ml are likely to go on to clear HBsAg, consistent  
360 with previous longitudinal surveillance suggesting that baseline HBsAg levels may be a more  
361 accurate prognostic marker than HBV viral load (21, 22). Prospective studies of large HBV cohorts  
362 are likely to be needed to identify individuals on a clearance trajectory; enhanced surveillance of  
363 these individuals is a promising future route to understanding the immunological correlates of  
364 HBsAg clearance.

365

### 366 ***Caveats and limitations***

367 Clinical data, particularly when collected retrospectively, present significant challenges for analysis.  
368 Despite the automated, integrated approach we used, heterogeneity arises from a wide range of  
369 factors, all of which potentially limit or distort analysis (summarised in Table 4). We set stringent  
370 standards for the quality of data to be included in this analysis, but consequently excluded a  
371 substantial proportion of our overall dataset from the record. Careful consideration is needed to  
372 balance between inclusion of potentially erroneous or misleading data with the additional power

373 that can be gained from maximising the overall size of datasets. As larger datasets are amassed,  
374 the significance of individual errors will be diluted.

375

### 376 ***Future questions***

377 Prospective surveillance is important in order to provide the opportunity for studying relevant  
378 immune responses during the clearance phase. As we have shown that clearance is a relatively  
379 long process, occurring over a median of 54 weeks for HBeAg and 157 weeks for HBsAg, this  
380 provides a window of opportunity for sampling and follow-up. There is an important distinction to be  
381 made between functional cure (sustained loss of HBsAg) and sterilising cure (loss of cccDNA  
382 integrated into hepatocyte nuclei); further work is needed to develop biomarkers that can detect  
383 cccDNA in order to distinguish between these two different outcomes.

384

385 Studies of both host and viral genetics are required to underpin a better understanding of the  
386 mechanisms of clearance, including new approaches to generating full length deep sequencing of  
387 HBV, and unbiased methods to study host genetic polymorphisms that impact on disease  
388 outcome. In order to power such studies sufficiently to detect relevant signals, large collaborative  
389 multi-centre studies may be required. As we improve our insights into the dynamic changes of  
390 serological markers, opportunities arise for improving prognostication and providing better patient-  
391 stratified care.

392

## 393 **MATERIALS AND METHODS**

### 394 **Clinical cohorts and data collection**

395 Our HBV cohort was collected from the records of a large UK teaching hospital in Oxford  
396 (<http://www.ouh.nhs.uk/>), which provides 1 million patient contacts per year and receives  
397 laboratory samples from the community and four inpatient sites. We retrospectively identified  
398 individuals aged  $\geq 18$  at time of database interrogation (26-Mar-2018) with chronic HBV infection  
399 (defined as positive HBsAg on  $\geq 2$  occasions  $\geq 6$  months apart) based on laboratory data collected  
400 between January 2011 and December 2016. Inclusion criteria and other case definitions are set  
401 out in Table 1.

402

403 Our cohort was initially defined by an electronic search of the microbiology laboratory information  
404 management systems (LIMS) to identify individuals with a positive HBsAg test. Individual subjects  
405 were allocated a pseudo-anonymised ID prefixed 'HBS', these ID numbers are included in the text  
406 to allow relevant results to be identified from within our metadata table (Suppl data table 2). We  
407 generated a data dictionary of search terms (Table 5) to define the data set. A data product was  
408 then created using the Oxford Clinical Informatics Groups research data warehouse. The data  
409 warehouse (Fig 5) receives data from operational systems within the hospital, such as electronic  
410 patient records (EPR) and LIMS, and maps this data to individuals. Each item in our data  
411 dictionary was retrieved and used to create a pseudo-anonymised data product for each individual.  
412 These data were cleaned and individuals not meeting inclusion criteria (Table 1) were removed.

413

414 We devised classification criteria for HBsAg and HBeAg to sort each individual into a category  
415 based on the dynamics of these serologic markers (Table 1). For HBsAg and HBeAg 'clearers' and  
416 HBsAg 'potential clearers', data which were not captured electronically or were not available from  
417 the data warehouse e.g. (most recent transient elastography score and HBV treatment status),  
418 were retrieved from the patient's written clinical record or from dictated letters from the viral  
419 hepatitis clinic.

420

## 421 **Ethics**

422 The NIHR HIC Viral Hepatitis database was approved by the NRES Committee South Central-  
423 Oxford C on 6<sup>th</sup> October 2015 (REC reference: 15/SC/0523).

424

## 425 **Statistical analysis**

426 We cleaned and analysed data using R and the data.table package (32). The clearance rate was  
427 calculated as  $\frac{\text{Number of patients who cleared}}{\text{Total patient years}} \times 100$ . Plots were created using ggplot2 (33), and  
428 survival analysis and Kaplan-Meier plots created using the survival and rms packages (34). We  
429 used Wilcoxon or Kruskal Wallis tests for mean comparison of continuous variables, Fisher's exact  
430 test for comparison of categorical variables, and logistic regression for multivariate analysis. Code



431 used for this analysis is available in the attached HBsAg\_Final\_Analysis.html file included in the  
432 supplementary information. To define HBsAg clearance time-frames, we measured from the time  
433 of the last HBsAg result of >1000 IU/ml (or the result closest to 1000 IU/ml) to the time point at  
434 which HBsAg first became undetectable. For analysis of ALT, we used the result corresponding to  
435 the time of the first HBsAg test result.  
436

437 **TABLES**

438 **Table 1: Summary of criteria used to confirm inclusion in the analysis and to classify**  
 439 **individuals according to HBsAg dynamics and HBeAg dynamics**

| Category                         | Criteria                                                                                                                                                                                                                                                                                                                                                                                                                                                                                                                                        |
|----------------------------------|-------------------------------------------------------------------------------------------------------------------------------------------------------------------------------------------------------------------------------------------------------------------------------------------------------------------------------------------------------------------------------------------------------------------------------------------------------------------------------------------------------------------------------------------------|
| Inclusion in cohort for analysis | <ul style="list-style-type: none"> <li>• Unique electronic record available</li> <li>• Age <math>\geq 18</math> at time of data interrogation</li> <li>• Longitudinal laboratory data available</li> <li>• No ambiguous data points<sup>a</sup></li> <li>• HBsAg detectable at <math>\geq 2</math> timepoints <math>\geq 6</math> months apart (HBsAg <math>&gt; 20</math> IU/ml)</li> <li>• <math>\geq 1</math> further HBsAg reading (either positive or negative) with a total surveillance period of <math>\geq 12</math> months</li> </ul> |
| <b>HBsAg categories</b>          |                                                                                                                                                                                                                                                                                                                                                                                                                                                                                                                                                 |
| HBsAg clearer                    | <ul style="list-style-type: none"> <li>• HBsAg initially detectable, but subsequently falls below the limit of detection (<math>&lt; 20</math> IU/ml)</li> <li>• HBsAg does not rebound to <math>\geq 20</math> IU/ml</li> <li>• <math>\geq 2</math> consecutive HBsAg readings <math>&lt; 20</math> IU/ml</li> </ul>                                                                                                                                                                                                                           |
| Potential HBsAg clearer          | <ul style="list-style-type: none"> <li>• HBsAg falls <math>&lt; 1000</math> IU/ml on <math>\geq 2</math> independent occasions,</li> <li>• HBsAg does not rebound to <math>&gt; 1000</math> IU/ml</li> <li>• HBsAg not below the limit of detection for two consecutive readings</li> </ul>                                                                                                                                                                                                                                                     |
| Non HBsAg clearer                | <ul style="list-style-type: none"> <li>• All individuals who are not classified as HBsAg clearer or potential clearer</li> </ul>                                                                                                                                                                                                                                                                                                                                                                                                                |
| <b>HBeAg categories</b>          |                                                                                                                                                                                                                                                                                                                                                                                                                                                                                                                                                 |
| HBeAg persistently positive      | <ul style="list-style-type: none"> <li>• HBeAg above the limit of detection (<math>\geq 20</math> IU/ml) for all timepoints.</li> </ul>                                                                                                                                                                                                                                                                                                                                                                                                         |
| HBeAg persistently negative      | <ul style="list-style-type: none"> <li>• HBeAg below the limit of detection (<math>&lt; 20</math> IU/ml) for all timepoints.</li> </ul>                                                                                                                                                                                                                                                                                                                                                                                                         |
| HBeAg clearer                    | <ul style="list-style-type: none"> <li>• HBeAg detectable at <math>\geq 2</math> independent timepoints and subsequently falls below the limit of detection for <math>\geq 2</math> consecutive timepoints</li> <li>• HBeAg does not rebound above the limit of detection</li> </ul>                                                                                                                                                                                                                                                            |
| Non HBeAg Clearer                | <ul style="list-style-type: none"> <li>• All individuals who are not classified as persistently HBeAg positive, negative or as an HBeAg clearer</li> </ul>                                                                                                                                                                                                                                                                                                                                                                                      |

440 <sup>a</sup> Records with free text or uninterpretable data were removed from analysis

441

442

443 **Table 2: Baseline characteristics of 319 individuals with chronic HBV infection recruited**  
 444 **through a UK cohort and classified according to pattern of HBsAg clearance over time.**  
 445

|                                                             | Whole cohort                 | HBsAg clearers and potential clearers | HBsAg non-clearers           | p-value (uni-variate analysis) | p-value (multi-variate analysis) |
|-------------------------------------------------------------|------------------------------|---------------------------------------|------------------------------|--------------------------------|----------------------------------|
| Number of individuals                                       | 319                          | 40                                    | 279                          | NA                             | NA                               |
| Median age in years at time of first HBsAg test             | 34                           | 40                                    | 34                           | 0.0034*                        | 0.0081*                          |
| Sex (%)                                                     |                              |                                       |                              | 0.605                          | 0.605                            |
| Male                                                        | 191 (60)                     | 26 (65)                               | 165 (59)                     |                                |                                  |
| Female                                                      | 128 (40)                     | 14 (35)                               | 114 (41)                     |                                |                                  |
| Self-reported ethnicity (%)                                 |                              |                                       |                              |                                |                                  |
| White                                                       | 92 (29)                      | 15 (38)                               | 77 (28)                      | 0.649                          | 0.632                            |
| Mixed                                                       | 18 (6)                       | 0 (0)                                 | 18 (6)                       | 0.991                          | 0.989                            |
| Asian or Asian British                                      | 52 (16)                      | 7(18)                                 | 45 (16)                      | 0.641                          | 0.705                            |
| Black or Black British                                      | 46 (14)                      | 5 (12)                                | 41 (15)                      | 0.697                          | 0.638                            |
| Chinese                                                     | 56 (18)                      | 8 (20)                                | 48 (17)                      | 0.902                          | 0.914                            |
| Any Other Ethnic Group                                      | 7 (2)                        | 0 (0)                                 | 7 (3)                        | 0.992                          | 0.994                            |
| Not Stated                                                  | 48 (15)                      | 5 (12)                                | 43 (15)                      | NA                             | NA                               |
| HBeAg positive status at baseline (%)                       | 81 (25)                      | 6 (15)                                | 65 (23)                      | 0.3105                         | 0.131                            |
| Median elastography score, kPa (based on most recent value) | 5.3                          | 4.5                                   | 5.5 <sup>a</sup>             | 0.18                           | NA                               |
| Number of patients receiving treatment (%)                  | 142/211 <sup>b</sup><br>(67) | 11/40 <sup>c</sup><br>(28)            | 131/171 <sup>b</sup><br>(76) | NA                             | NA                               |

446 <sup>a</sup> Elastography data available for 42 individuals in the non-clearance group, as data not routinely recorded  
 447 electronically.

448 <sup>b</sup> Treatment data were missing for 108 individuals among the HBsAg non-clearers, as data not routinely  
 449 recorded electronically.

450 <sup>c</sup> Treatment in the 12 months before the last positive HBsAg test

451 NA = not applicable

452

453 **Table 3: Baseline characteristics of HBeAg positive individuals classified according to**  
 454 **HBeAg clearance over the observed time period**  
 455

|                                                             | HBeAg clearers | HBeAg non-clearers      | p-value (uni-variate analysis) |
|-------------------------------------------------------------|----------------|-------------------------|--------------------------------|
| Number of individuals                                       | 44             | 37                      |                                |
| Median age in years at time of first HBsAg test             | 34             | 35                      | 0.75                           |
| Sex (%)                                                     |                |                         | 1                              |
| Male                                                        | 29 (66)        | 25 (58)                 |                                |
| Female                                                      | 15 (34)        | 12 (32)                 |                                |
| Self-reported Ethnicity (%)                                 |                |                         |                                |
| White                                                       | 12 (27)        | 10 (27)                 | 0.959                          |
| Mixed                                                       | 4 (9)          | 4 (11)                  | 0.819                          |
| Asian or Asian British                                      | 8 (18)         | 3 (8)                   | 0.427                          |
| Black or Black British                                      | 6 (14)         | 0 (0)                   | 0.991                          |
| Chinese                                                     | 8 (18)         | 14 (38)                 | 0.330                          |
| Any Other Ethnic Group                                      | 1 (2)          | 2 (5)                   | 0.512                          |
| Not Stated                                                  | 5 (11)         | 4 (11)                  | NA                             |
| Median elastography score, kPa (based on most recent value) | 5.5            | 4.55                    | 0.24                           |
| Number of patients receiving treatment <sup>a</sup> (%)     | 24/44 (55)     | 24/27 <sup>b</sup> (89) | NA                             |

456 NA = not applicable

457 <sup>a</sup> Treatment in the 12 months prior to the last positive HBeAg result

458 <sup>b</sup> Treatment data were missing for 10 individuals among the HBeAg non-clearers as data not  
 459 routinely collected electronically.

460  
 461

462 **Table 4: Factors influencing the analysis of retrospective clinical HBV data**

| Category of influence     | Examples of the effect on data integrity                                                                                                                                                                                                                                                                                                                                                                                                                                                                                                                                                                                                                                                                                                                                                                                                                                                                                                                                                                                                                                                                                                                     |
|---------------------------|--------------------------------------------------------------------------------------------------------------------------------------------------------------------------------------------------------------------------------------------------------------------------------------------------------------------------------------------------------------------------------------------------------------------------------------------------------------------------------------------------------------------------------------------------------------------------------------------------------------------------------------------------------------------------------------------------------------------------------------------------------------------------------------------------------------------------------------------------------------------------------------------------------------------------------------------------------------------------------------------------------------------------------------------------------------------------------------------------------------------------------------------------------------|
| <b>Patient factors</b>    | <ul style="list-style-type: none"> <li>• Many individuals with CHB infection globally are not diagnosed; those with data available for clinical analysis represent a distinct minority group who have been able to access healthcare and follow-up (35).</li> <li>• Patients are lost to follow-up or move between regions.</li> <li>• HBV diagnosis rarely occurs in acute infection, so the duration of infection prior to clearance is unknown.</li> <li>• HBsAg clearance is a relatively infrequent event and thus patient numbers for analysis are small.</li> <li>• Description of a changing cohort is challenging e.g. age changes over time, patients start and stop therapy.</li> </ul>                                                                                                                                                                                                                                                                                                                                                                                                                                                           |
| <b>Healthcare factors</b> | <ul style="list-style-type: none"> <li>• Different assays are not always requested simultaneously, thus limiting the correlation between variables (e.g. HBV DNA vs HBsAg).</li> <li>• Follow-up occurs over a variety of different time frames, with different intervals between follow up visits; clearance durations may therefore be over-estimated due to infrequent sampling.</li> <li>• Treatment can alter the dynamics of biomarkers (e.g. ALT, HBV DNA).</li> </ul>                                                                                                                                                                                                                                                                                                                                                                                                                                                                                                                                                                                                                                                                                |
| <b>Laboratory factors</b> | <ul style="list-style-type: none"> <li>• Assay platforms change over time, which may alter sensitivity, specificity and limits of detection.</li> <li>• Quantitative assays have upper and lower limits of quantification; values outside the window of detection cannot be analysed.</li> <li>• False positive or false negative tests may occur.</li> <li>• Certain data are not routinely generated or captured (e.g. HBV genotype).</li> </ul>                                                                                                                                                                                                                                                                                                                                                                                                                                                                                                                                                                                                                                                                                                           |
| <b>Data factors</b>       | <ul style="list-style-type: none"> <li>• Results are captured by a variety of different electronic systems (electronic patient record, electronic laboratory systems, pharmacy systems, hand-written clinical notes, dictated clinic letters).</li> <li>• Different healthcare professionals may not record data consistently and coding is subject to errors.</li> <li>• Free text entries in laboratory reporting can lead to errors or ambiguities (e.g. use of comma vs. full stop for decimal point). Certain parameters are not consistently recorded, e.g. ethnicity.</li> <li>• The electronic pipeline only collects certain pre-defined data (e.g. for HIV, HCV, HDV we were only able to access viral load data, not antibody tests, and therefore we do not know the denominator of total tests performed).</li> <li>• Treatment data may not be recorded electronically (often recorded as part of paper notes, making them more difficult to trace); start dates often not documented for patients on long-term treatment.</li> <li>• Poor continuity of data when patients are transferred between different healthcare providers.</li> </ul> |

463

464

465  
466  
467  
468

**Table 5: ‘Data dictionary’ of clinical and demographic parameters collected for cohort of individuals with chronic HBV infection**

| Laboratory Parameter                            | Data source                                                        | Date range (for laboratory parameters) | Assay platform                                                                                                                      | Notes                                                                                                                                |
|-------------------------------------------------|--------------------------------------------------------------------|----------------------------------------|-------------------------------------------------------------------------------------------------------------------------------------|--------------------------------------------------------------------------------------------------------------------------------------|
| HBsAg                                           | Microbiology LIMS (Sunquest)                                       | 09/2004 – 03/2018                      | Centaur; 09/2004 – 12/2014<br><br>Abbott Architect i2000SR (Abbott laboratories, Chicago, IL); 12/2014 – 03/2018                    | Traditionally reported as binary test (positive/negative) but generates semi-quantitative data. Lower limit of detection 0.05 IU/mL. |
| HBeAg                                           | Microbiology LIMS (Sunquest)                                       | 04/1995 - 03/2018                      | Centaur; 09/2004 – 12/2014<br><br>Abbott Architect i2000SR (Abbott laboratories, Chicago, IL) 12/2014 – 03/2018                     | Traditionally reported as binary test (positive/negative) but generates semi-quantitative data.                                      |
| HBV DNA                                         | Microbiology LIMS (Sunquest)                                       | 03/2009 – 03/2018                      | Cobas TaqMan assay (Roche diagnostics, Branchburg, NJ)                                                                              | Lower limit of detection $0.9 \times 10^4$ IU/mL. 1 IU/ml is equivalent to 2.5-5 genome equivalents (copies/ml)                      |
| ALT                                             | Biochemistry LIMS (LIMS)                                           | 02/2013 – 01/2018                      | Siemens ADVIA 2400; 02/2013 – 01/2015<br><br>Abbott Architect c16000 or c8000 (Abbott laboratories, Chicago, IL); 01/2015 – 01/2018 | Reported as quantitative value. Normal reference range 10-45 IU/L                                                                    |
| Ethnicity                                       | Hospital EPR (Cerner Millennium)                                   | NA                                     | NA                                                                                                                                  | Self-reported according to standardised ethnicity codes                                                                              |
| Fibroscan result (transient elastography score) | Hospital EPR (Cerner Millennium) / Clinic letter database (Manual) | NA                                     | EchoSens, Paris                                                                                                                     | Most recent recorded elastography result                                                                                             |
| HBV treatment status                            | Hospital EPR (Cerner Millennium) / Clinic letter database (Manual) | NA                                     | NA                                                                                                                                  | Treatment guidelines changed over time, so use of different agents applied across the timespan of the cohort.                        |

469 LIMS = Laboratory information management system; EPR = Electronic patient record

470  
471

472 **FIGURE LEGENDS:**

473 **Fig 1: Cartoons depicting key pathways in HBV replication cycle to illustrate targets that**  
474 **may bring about control or clearance.**

475

476 **A: Pathways relevant to maintenance of HBV infection.** HBV viral DNA is released in the  
477 nucleus, and cccDNA is formed by covalent ligation of the two DNA strands. A stable mini-  
478 chromosome is formed, allowing persistence of the virus over time. The cccDNA acts as the  
479 template for mRNA and pregenomic RNA (pgRNA). Viral reverse transcriptase (RT) generates  
480 new genomic DNA from pgRNA. Non-infectious sub-viral particules (SVP) form from HBsAg and  
481 new infectious virions assemble, for release into the blood stream. HBsAg measurement accounts  
482 for both the SVP and infectious virions, whereas infectious virions alone can be measured through  
483 HBV viral load (HBV DNA).

484

485 **B: Pathways relevant to suppression of HBV infection by NA therapy:** Inhibition of viral RT  
486 suppresses generation of new viral DNA. This means new infectious HBV virions cannot be  
487 constructed and HBV DNA is undetectable in plasma. However, cccDNA remains as a persistent  
488 reservoir in the hepatocyte nucleus, so HBsAg production can continue and rebound viraemia is  
489 likely following cessation of therapy. For this reason, individuals with CHB on successful treatment  
490 frequently have an undetectable viral load but remain HBsAg-positive.

491 **C: Pathways relevant to functional or sterilising cure of HBV infection:** Upregulation of host  
492 immune responses or therapy with interferon (IFN) leads to elimination of the persistent cccDNA  
493 reservoir either through death of the hepatocyte or unknown non-lytic methods. HBsAg and HBV  
494 DNA both disappear from the blood stream. In practice, there is no clinical test that can confirm  
495 complete ('sterilising') cure, so this group is usually regarded as being at a small risk of relapse  
496 (i.e. 'functional' cure).

497

498 **Fig 2: Flowchart showing identification and classification of adults with chronic HBV**  
499 **infection from a hospital electronic system.** The figure represents 319 individuals who met

500 inclusion criteria, and divides these into three different categories according to HBsAg clearance,  
501 and four categories for HBeAg; (for classification criteria, see Table 1).

502

503 **Fig 3: Exemplar trajectories of HBsAg over time representing adults with chronic HBV**  
504 **infection.** Individuals are classified as (A) a complete HBsAg clearer, (B) a potential HBsAg  
505 clearer (C) a non-HBsAg clearer; (for classification criteria, see Table 1).

506

507 **Fig 4: Kaplan-Meier curves showing trajectory of HBsAg clearance (N=13) and HBeAg**  
508 **clearance (N=43) for selected individuals who met criteria for complete clearance from**  
509 **within a cohort of adults with chronic HBV infection.** Data are shown for HBsAg (panels A-C)  
510 and for HBeAg (panels D-F), initially for all clearers (panels A and D), and then subdivided  
511 according to treatment status (panels B and E). Boxes C and F report the median time to  
512 clearance for each group in weeks, with 95% confidence intervals. For HBsAg clearance, the  
513 upper confidence interval for treated cases cannot be determined due to small numbers.  
514 Treatment of HBsAg clearers and potential clearers comprised TDF monotherapy (n=3), TDF with  
515 emtricitabine (n=2), 3TC with ADV or TDF (n=4), 3TC monotherapy (n=1), ETV monotherapy (n=1).  
516 Treatment of HBeAg clearers comprised TDF monotherapy (n=10). 3TC monotherapy (n=2) ETV  
517 monotherapy (n=5), 3TC with ADV (n=3), IFN with RBV (n=1), IFN monotherapy (n=3), treatment  
518 data were not available for one individual. \* When no values >1000 IU/ml were recorded, the  
519 highest value was used. \*\* Not enough data to calculate upper CI. § Treatment status not known  
520 for 1 individual.

521

522 **Fig 5: Flow diagram to depict collection, storage and output of electronic clinical data from**  
523 **a Health Informatics Collaborative data warehouse.**

524 The data warehouse receives data from operational systems within the hospital such as electronic  
525 patient records and laboratory information management systems (LIMS) and maps this data to  
526 individuals where the identifiers are then stored in the master data store and provides the  
527 mappings for data products. De-identified linked data is stored separately and forms the content of  
528 data products. Definitions of data items are recorded in the metadata catalogue. Data items for the



529 data product are selected using the definitions in the metadata catalogue the mappings for these  
530 are retrieved from the master data store and data retrieved from the integrated data store to create  
531 the final data product.

532

533

534

535 **SUPPLEMENTARY DATA:**

536 On acceptance for publication, Supplementary Data will be made available at DOI:  
537 10.6084/m9.figshare.7262957.

538 Prior to publication, these files can be accessed using the following URL:  
539 <https://figshare.com/s/82db3b5cd1dc5c6dd566>

540

541 **Supplementary Table 1: Summary of studies reporting rate and quantitation of HBsAg**  
542 **clearance in individuals with HBV infection** - Listed studies were identified from a PubMed  
543 search performed in April 2018 with the search terms: ('hepatitis B' OR 'HBV') AND ('clearance'  
544 OR 'seroclearance' OR 'vir\* negative'), written in English between 2008 – 2018, and reporting a  
545 cumulative or annual clearance rate of HBsAg using a quantitative assay.

546

547 **Supplementary Table 2: Data for 319 adults with chronic HBV infection**

548

549 **Supplementary Figure 1: Longitudinal data for 13 adults with chronic HBV infection who**  
550 **completely cleared HBsAg** - Each individual is labelled with a unique anonymised ID number,  
551 prefixed HBS. Time is shown in weeks since the first HBsAg positive test. Units (y-axis) are shown  
552 in IU/ml, except for ALT which is shown in IU/L.

553

554 **Supplementary Figure 2: Longitudinal data for 27 adults with chronic HBV infection on a**  
555 **potential HBsAg clearance trajectory.** Each individual is labelled with a unique anonymised ID  
556 number, prefixed HBS. Time is shown in weeks since the first HBsAg positive test. Units (y-axis)  
557 are shown in IU/ml, except for ALT which is shown in IU/L.

558

559 **Supplementary Figure 3: Longitudinal data for 279 adults with chronic HBV infection who**  
560 **did not clear HBsAg.** Each individual is labelled with a unique anonymised ID number, prefixed  
561 HBS. Time is shown in weeks since the first HBsAg positive test. Units (y-axis) are shown in IU/ml,  
562 except for ALT which is shown in IU/L.

563

564 **Supplementary Figure 4: Boxplot showing the distribution of age among individuals who**  
565 **clear or potentially clear HBsAg (n=40, median age 40) and those who do not clear HBsAg**  
566 **(n=279; median age 34).**

567

568 **Supplementary Figure 5: Longitudinal data for 44 adults with chronic HBV infection who**  
569 **cleared HBeAg.** Each individual is labelled with a unique anonymised ID number, prefixed HBS.  
570 Time is shown in weeks since the first HBsAg positive test. Units (y-axis) are shown in IU/ml,  
571 except for ALT which is shown in IU/L.

572

573 **Supplementary Figure 6: Longitudinal data for adults with chronic HBV infection who did**  
574 **not clear HBeAg.** Each individual is labelled with a unique anonymised ID number, prefixed HBS.  
575 Time is shown in weeks since the first HBsAg positive test. Units (y-axis) are shown in IU/ml,  
576 except for ALT which is shown in IU/L.

577

578 **Supplementary Figure 7: Longitudinal data for adults with chronic HBV infection whose**  
579 **HBeAg status fluctuates.** Each individual is labelled with a unique anonymised ID number,  
580 prefixed HBS. Time is shown in weeks since the first HBsAg positive test. Units (y-axis) are shown  
581 in IU/ml, except for ALT which is shown in IU/L.

582

583 **Supplementary Figure 8: Boxplot showing the distribution and median of the closest ALT**  
584 **result to the first HBsAg test recorded among adults with chronic HBV infection who**  
585 **cleared, potentially cleared, or did not clear HBsAg**

586

587 **Supplementary Code:** html file

588 **REFERENCES**

- 589 1. 2017. EASL 2017 Clinical Practice Guidelines on the management of hepatitis B  
590 virus infection. *J Hepatol* 67(2):370–398.
- 591 2. Jaroszewicz J, Serrano BC, Wursthorn K, Deterding K, Schlue J, Raupach R, Flisiak  
592 R, Bock CT, Manns MP, Wedemeyer H, Cornberg M. 2010. Hepatitis B surface  
593 antigen (HBsAg) levels in the natural history of hepatitis B virus (HBV)-infection: A  
594 European perspective. *J Hepatol* 52:514–522.
- 595 3. WHO. 2017. Hepatitis B. Fact Sheet [http://www.who.int/news-room/fact-](http://www.who.int/news-room/fact-sheets/detail/hepatitis-b)  
596 [sheets/detail/hepatitis-b.](http://www.who.int/news-room/fact-sheets/detail/hepatitis-b)
- 597 4. Seto W-K, Wong DK-H, Fung J, Ip PPC, Yuen JC-H, Hung IF-N, Lai C-L, Yuen M-F.  
598 2012. High hepatitis B surface antigen levels predict insignificant fibrosis in hepatitis  
599 B e antigen positive chronic hepatitis B. *PLoS One* 56:e43087.
- 600 5. Xun Y, Zang G, Guo J, Yu X, Liu H, Xiang J, Liu J, Shi J. 2013. Serum hepatitis B  
601 surface antigen quantification as a useful assessment for significant fibrosis in  
602 hepatitis B e antigen-positive hepatitis B virus carriers. *J Gastroenterol Hepatol*  
603 28:1746–1755.
- 604 6. Martinot-Peignoux M, Carvalho-Filho R, Ferreira AC, Cardoso N, Lapalus M, Lada  
605 O, Asselah T, Krause F, Marcellin P, Murray KF, Szenborn L, Wysocki J, Rossi S,  
606 Corsa AC, Dinh P, Mchutchison JG, Pang PS, Luminos LM, Pawlowska M, Mizerski  
607 J. 2012. Significant genotype-specific association of Hepatitis B surface antigen level  
608 and severity of liver disease in patients with chronic Hepatitis B. *J Hepatol* 56:S211.
- 609 7. Chen CJ, Iloeje UH, Yang HI. 2007. Long-Term Outcomes in Hepatitis B: The  
610 REVEAL-HBV Study. *Clin Liver Dis.* Elsevier.
- 611 8. Brunetto MR, Oliveri F, Colombatto P, Moriconi F, Ciccorossi P, Coco B, Romagnoli  
612 V, Cherubini B, Moscato G, Maina AM, Cavallone D, Bonino F. 2010. Hepatitis B  
613 surface antigen serum levels help to distinguish active from inactive hepatitis B virus

- 614 genotype D carriers. *Gastroenterology* 139:483–490.
- 615 9. Liu J, Yang H-I, Lee M-H, Jen C-L, Batrla-Utermann R, Lu S-N, Wang L-Y, You S-L,  
616 Chen C-J. 2016. Serum Levels of Hepatitis B Surface Antigen and DNA Can Predict  
617 Inactive Carriers With Low Risk of Disease Progression. *Hepatology* 64:381–389.
- 618 10. Huo T, Wu J-C, Hwang S-J, Lai C-R, Lee P-C, Tsay S-H, Chang F-Y, Lee S-D.  
619 2000. Factors predictive of liver cirrhosis in patients with chronic hepatitis B: a  
620 multivariate analysis in a longitudinal study. *Eur J Gastroenterol Hepatol* 12.
- 621 11. Iloeje UH, Yang H, Su J, Jen C, You S, Chen C. 2017. Predicting Cirrhosis Risk  
622 Based on the Level of Circulating Hepatitis B Viral Load. *Gastroenterology* 130:678–  
623 686.
- 624 12. R de F, Meucci G, Vecchi M, al et. 1993. The natural history of asymptomatic  
625 hepatitis b surface antigen carriers. *Ann Intern Med* 118:191–194.
- 626 13. Manno M, Cammà C, Schepis F, Bassi F, Gelmini R, Giannini F, Miselli F, Grottola  
627 A, Ferretti I, Vecchi C, De Palma M, Villa E. 2017. Natural history of chronic HBV  
628 carriers in northern Italy: Morbidity and mortality after 30 years. *Gastroenterology*  
629 127:756–763.
- 630 14. Hara T, Suzuki F, Kawamura Y, Sezaki H, Hosaka T, Akuta N, Kobayashi M, Suzuki  
631 Y, Saitoh S, Arase Y, Ikeda K, Kobayashi M, Watahiki S, Mineta R, Kumada H.  
632 2014. Long-term entecavir therapy results in falls in serum hepatitis B surface  
633 antigen levels and seroclearance in nucleos(t)ide-naive chronic hepatitis B patients.  
634 *J Viral Hepat* 21:802–808.
- 635 15. Kim G-A, Lim Y-S, An J, Lee D, Shim JH, Kim KM, Lee HC, Chung Y-H, Lee YS,  
636 Suh DJ. 2014. HBsAg seroclearance after nucleoside analogue therapy in patients  
637 with chronic hepatitis B: clinical outcomes and durability. *Gut* 63:1325–1332.
- 638 16. Kobayashi M, Hosaka T, Suzuki F, Akuta N, Sezaki H, Suzuki Y, Kawamura Y,  
639 Kobayashi M, Saitoh S, Arase Y, Ikeda K, Miyakawa Y, Kumada H. 2014.

- 640 Seroclearance rate of hepatitis B surface antigen in 2,112 patients with chronic  
641 hepatitis in Japan during long-term follow-up. *J Gastroenterol* 49:538–546.
- 642 17. Kuo Y-H, Chang K-C, Wang J-H, Tsai P-S, Hung S-F, Hung C-H, Lu S-N. 2015.  
643 Changing serum levels of quantitative hepatitis B surface antigen and hepatitis B  
644 virus DNA in hepatitis B virus surface antigen carriers: a follow-up study of an elderly  
645 cohort. *Kaohsiung J Med Sci* 31:102–107.
- 646 18. Nagaoka S, Abiru S, Komori A, Sasaki R, Bekki S, Hashimoto S, Saeki A, Yamasaki  
647 K, Migita K, Nakamura M, Ezaki H, Yatsushashi H. 2016. Hepatic flares promote  
648 rapid decline of serum hepatitis B surface antigen (HBsAg) in patients with HBsAg  
649 seroclearance: A long-term follow-up study. *Hepatol Res* 46:E89-99.
- 650 19. Park YM, Lee SG. 2016. Clinical features of HBsAg seroclearance in hepatitis B  
651 virus carriers in South Korea: A retrospective longitudinal study. *World J*  
652 *Gastroenterol* 22:9836–9843.
- 653 20. Jeng W-J, Chen Y-C, Chien R-N, Sheen I-S, Liaw Y-F. 2017. Incidence and  
654 predictors of HBsAg seroclearance after cessation of nucleos(t)ide analogue  
655 therapy in HBeAg negative chronic hepatitis B. *Hepatology*.
- 656 21. Ungtrakul T, Sriprayoon T, Kusuman P, Chunnuan P, Soonklang K, Sornsamdang  
657 G, Auewarakul CU, Tanwandee T. 2017. Role of quantitative hepatitis B surface  
658 antigen in predicting inactive carriers and HBsAg seroclearance in HBeAg-negative  
659 chronic hepatitis B patients. *Medicine (Baltimore)* 96:e6554.
- 660 22. Lim TH, Gane E, Moyes C, Borman B, Cunningham C. 2016. HBsAg loss in a New  
661 Zealand community study with 28-year follow-up: rates, predictors and long-term  
662 outcomes. *Hepatol Int* 10:829–837.
- 663 23. Sonneveld MJ, Hansen BE, Piratvisuth T, Jia J-D, Zeuzem S, Gane E, Liaw Y-F, Xie  
664 Q, Heathcote EJ, Chan HL-Y, Janssen HLA. 2013. Response-guided peginterferon  
665 therapy in hepatitis B e antigen-positive chronic hepatitis B using serum hepatitis B

- 666 surface antigen levels. *Hepatology* 58:872–880.
- 667 24. Moucari R, Mackiewicz V, Lada O, Ripault MP, Castelnau C, Martinot-Peignoux M,  
668 Dauvergne A, Asselah T, Boyer N, Bedossa P, Valla D, Vidaud M, Nicolas-Chanoine  
669 MH, Marcellin P. 2009. Early serum HBsAg drop: A strong predictor of sustained  
670 virological response to pegylated interferon alfa-2a in HBeAg-negative patients.  
671 *Hepatology* 49:1151–1157.
- 672 25. National institute for Health and Care Excellence. 2013. Hepatitis B (chronic):  
673 diagnosis and management. Clin Guidel [CG165].
- 674 26. Griggs D, Stafford-Smith M, Gaffney O, Rockstrom J, Ohman MC, Shyamsundar P,  
675 Steffen W, Glaser G, Kanie N, Noble I. 2013. Policy: Sustainable development goals  
676 for people and planet. *Nature* 495:305–307.
- 677 27. Habersetzer F, Moenne-Loccoz R, Meyer N, Schvoerer E, Simo-Noumbissie P,  
678 Dritsas S, Baumert TF, Doffoel M. 2015. Loss of hepatitis B surface antigen in a  
679 real-life clinical cohort of patients with chronic hepatitis B virus infection. *Liver Int*  
680 35:130–139.
- 681 28. Lumley S, Noble H, Hadley MJ, Callow L, Malik A, Chua YY, Duffey OJ, Grolmusova  
682 N, Kumar A, Ravenscroft S, Spencer JI, Neumann-Haefelin C, Thimme R,  
683 Andersson M, Klenerman P, Barnes E, Matthews PC. 2016. Hepitopes: A live  
684 interactive database of HLA class I epitopes in hepatitis B virus. *Wellcome Open*  
685 *Res* 1:9.
- 686 29. Matthews PC, Carlson JM, Beloukas A, Malik A, Jooste P, Ogwu A, Shapiro R,  
687 Riddell L, Chen F, Luzzi G, Jesuthasan G, Jeffery K, Jovic N, Ndung’U T, Carrington  
688 M, Goulder PJR, Geretti AM, Klenerman P. 2016. HLA-A is a Predictor of Hepatitis B  
689 e Antigen Status in HIV-Positive African Adults. *J Infect Dis* 213.
- 690 30. Lumley S, McNaughton A, Klenerman P, Lythgoe K, Matthews P. 2018. Hepatitis B  
691 virus Adaptation to the CD8 + T Cell Response: Consequences for Host and

- 692 Pathogen 9:1–14.
- 693 31. 2013. Nice Clinical Guideline, Hepatitis B (chronic): diagnosis and management.  
694 NICE Clinical Guideline.
- 695 32. Dowle M, Srinivasan A. 2018. data.table: Extension of `data.frame`. R package  
696 version 1.11.4. <https://CRAN.R-project.org/package=data.table>.
- 697 33. Wickham H. 2016. ggplot2: Elegant Graphics for Data Analysis. Springer-Verlag  
698 New York.
- 699 34. Therneau T. 2015. A Package for Survival Analysis in S\_. version 2.38, <URL:  
700 <https://CRAN.R-project.org/package=survival>>.
- 701 35. O'Hara GA, McNaughton AL, Maponga T, Jooste P, Ocamo P, Chilengi R, Mokaya  
702 J, Liyayi MI, Wachira T, Gikungi DM, Burbridge L, O'Donnell D, Akiror CS, Sloan D,  
703 Torimiro J, Yindom LM, Walton R, Andersson M, Marsh K, Newton R, Matthews PC.  
704 2017. Hepatitis B virus infection as a neglected tropical disease. PLoS Negl Trop Dis  
705 11.  
706





Fig 1

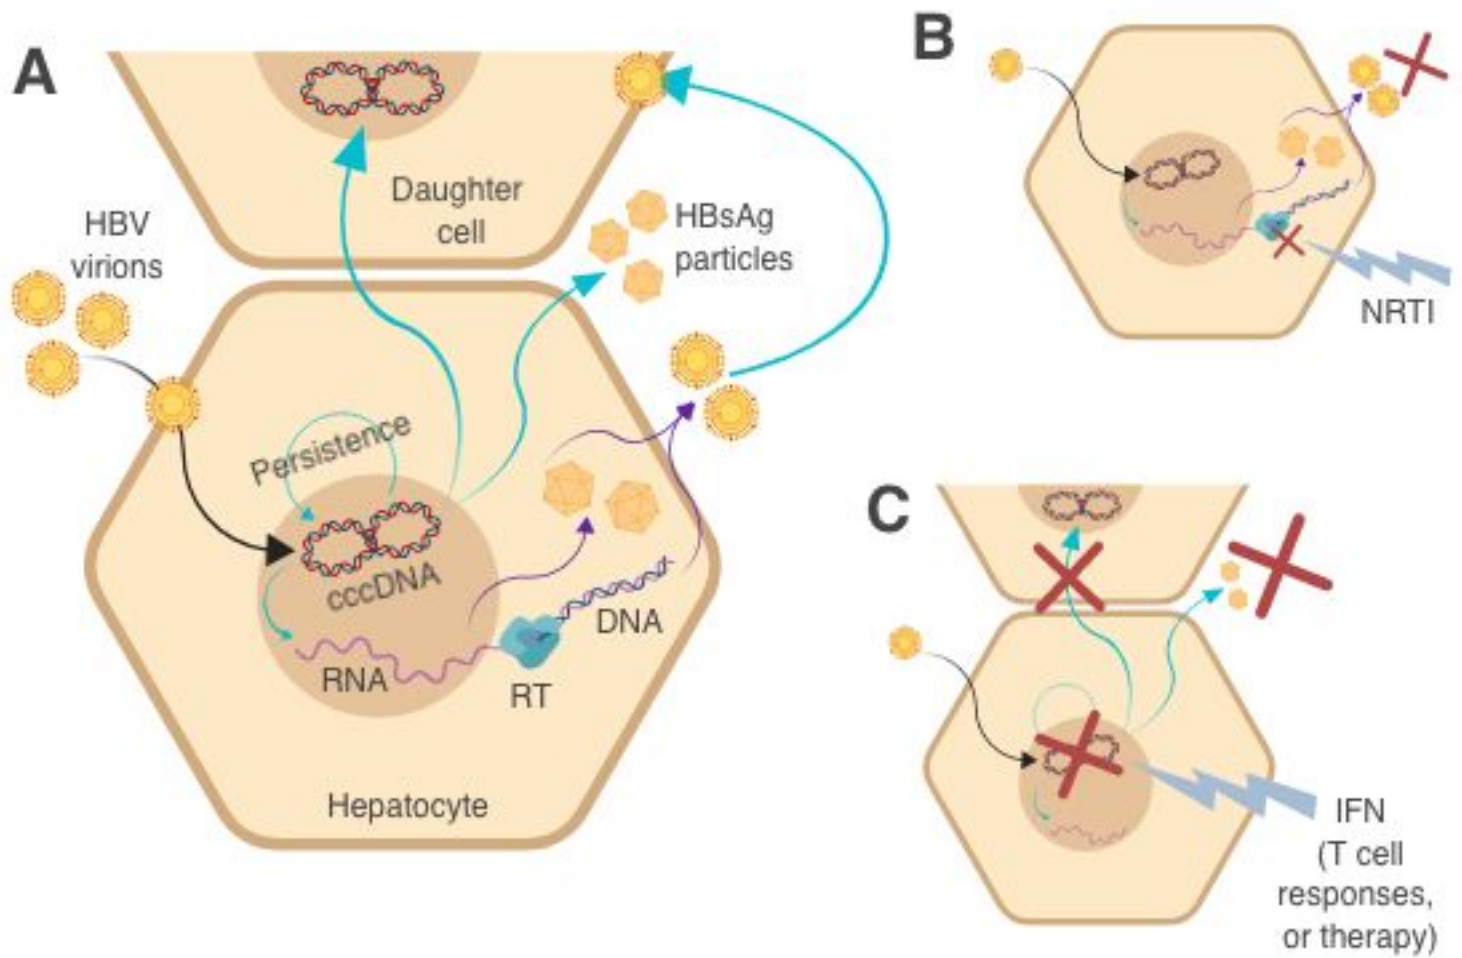

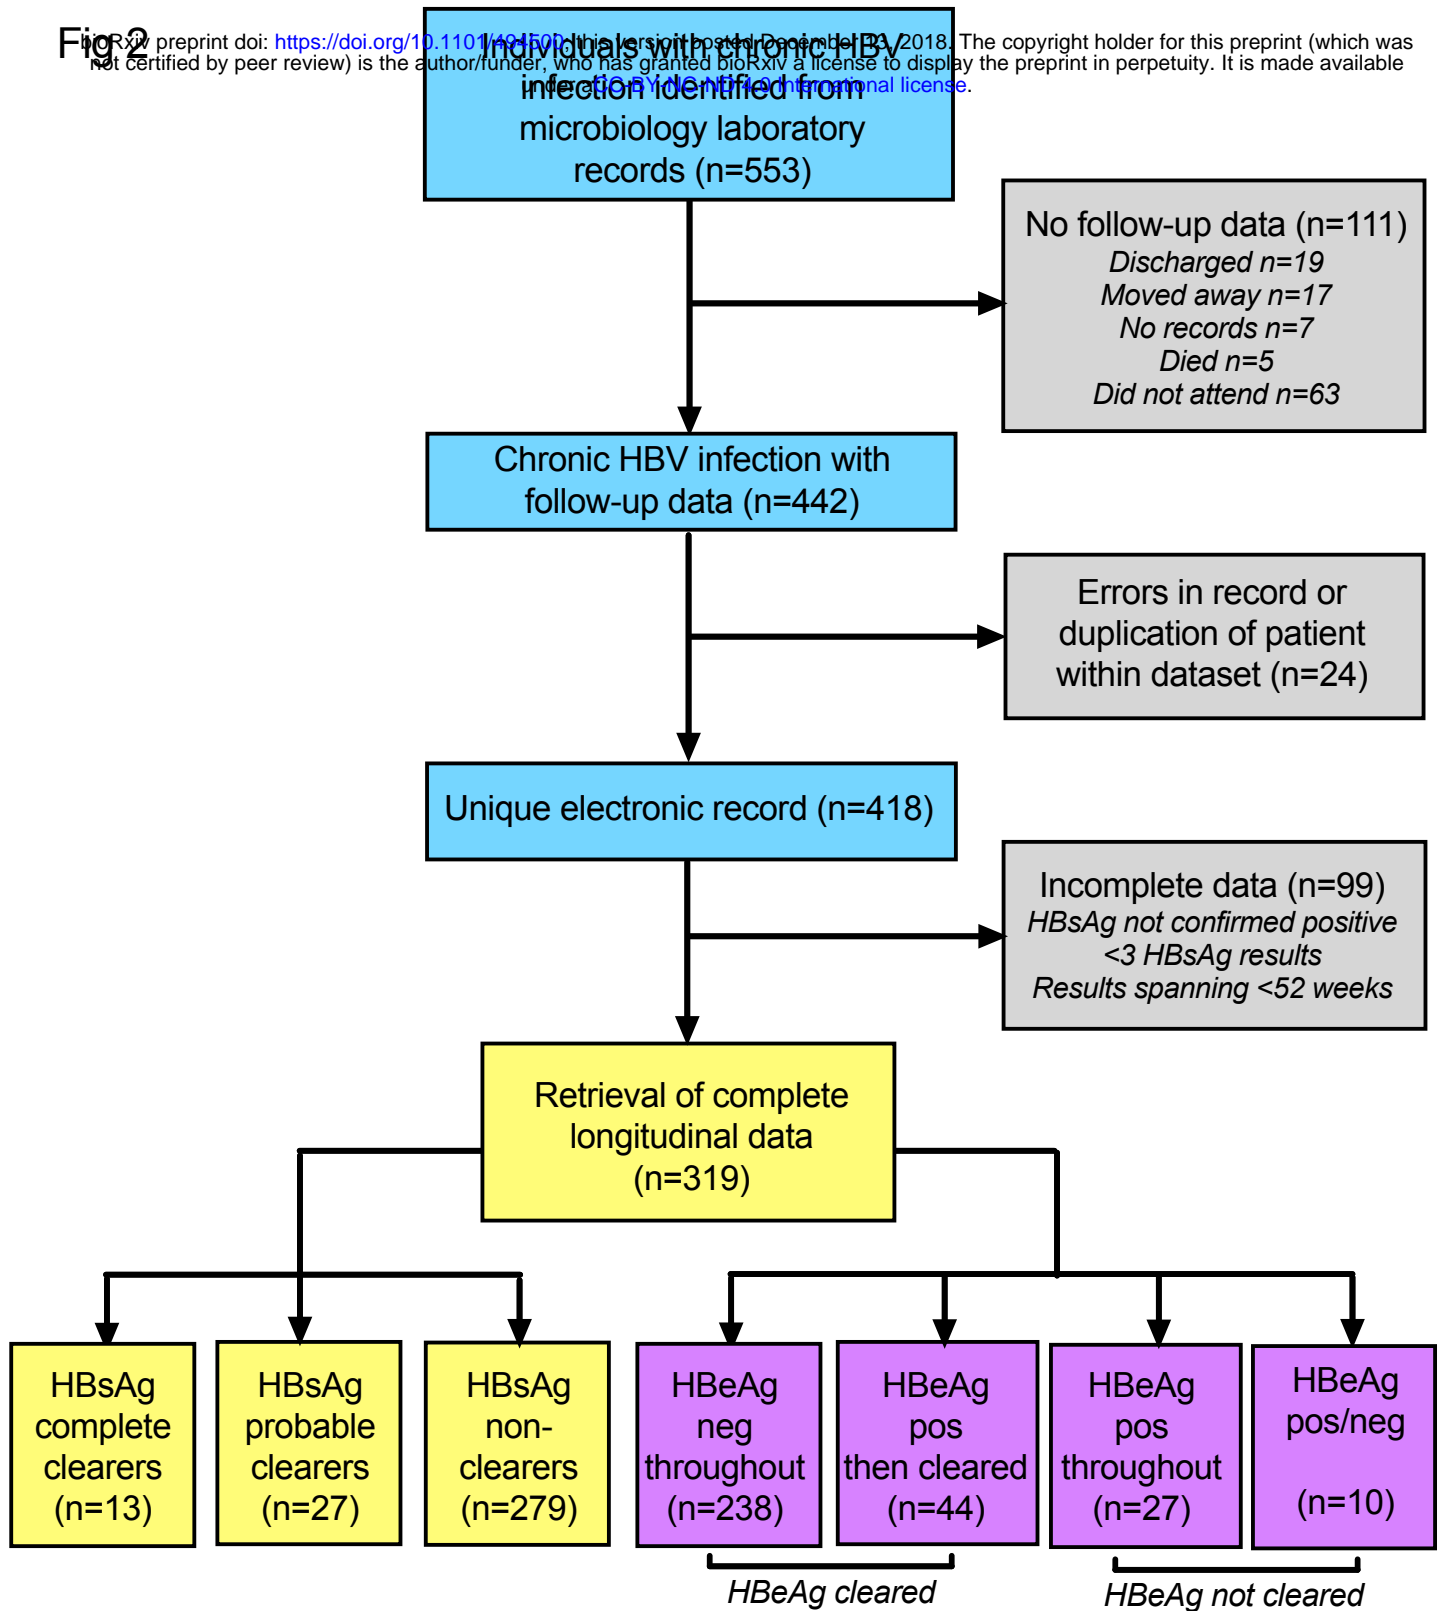

Fig 3

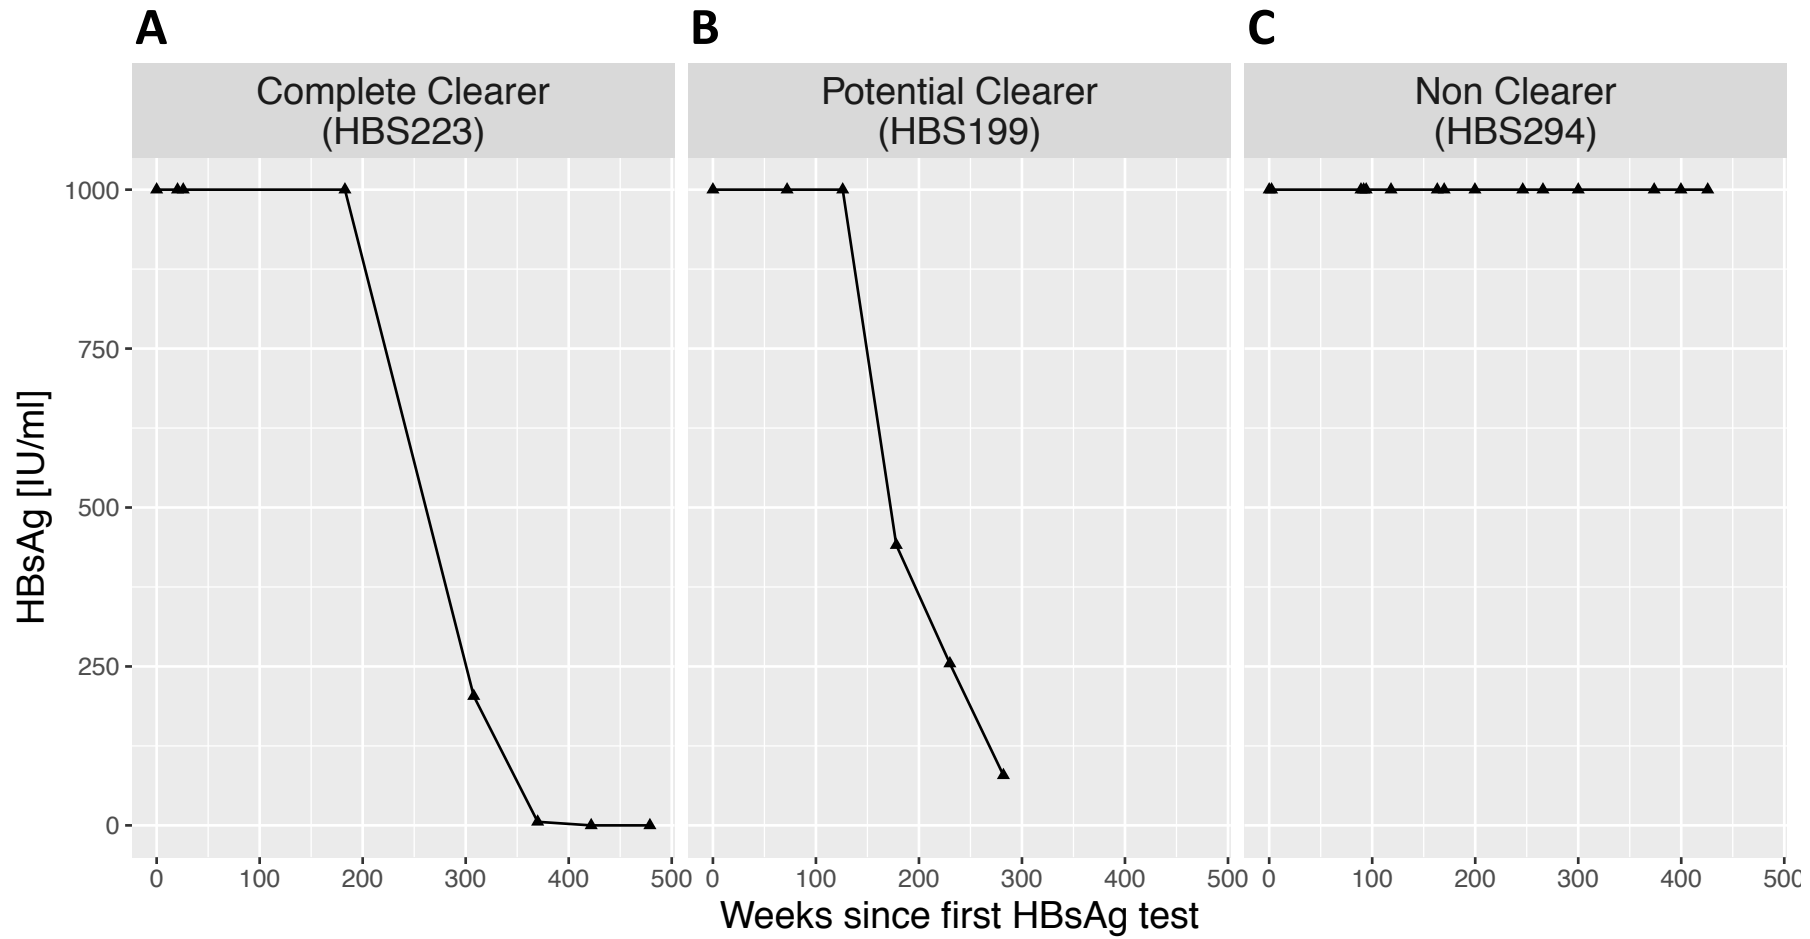

Fig 4

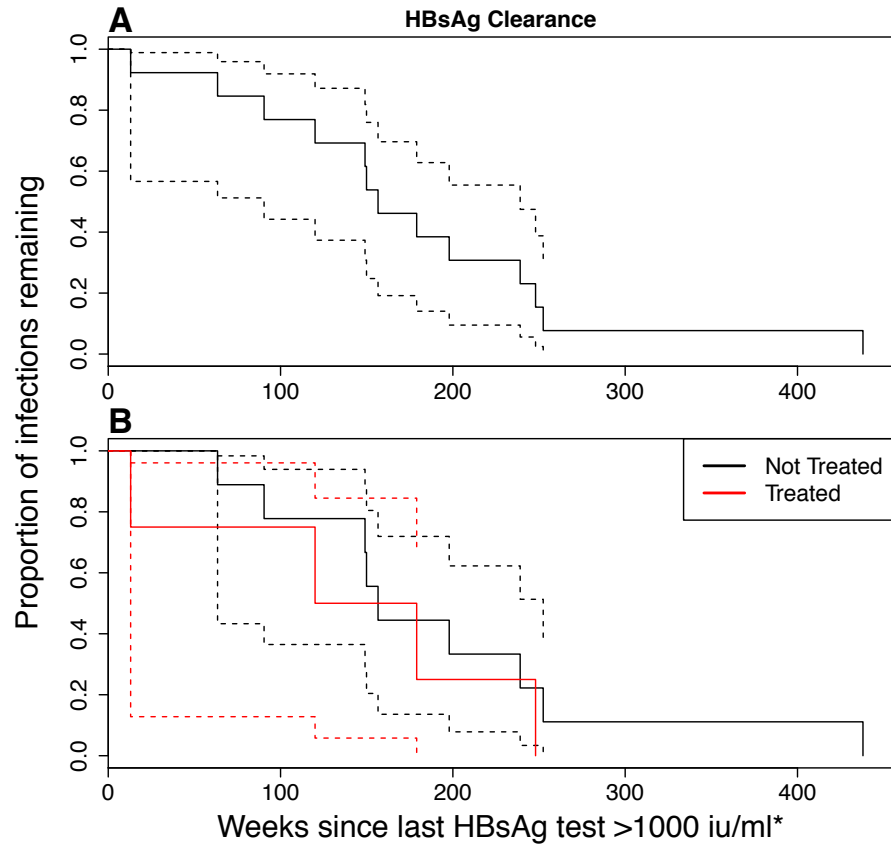

**C**

| Time (weeks)             | All cases of HBsAg clearance (n=13) | Untreated cases (n=9) | Treated cases (n=4) |
|--------------------------|-------------------------------------|-----------------------|---------------------|
| Median                   | 157                                 | 157                   | 150                 |
| 95% Confidence Intervals | 90 – 239                            | 63 - 252              | 13 – NA**           |

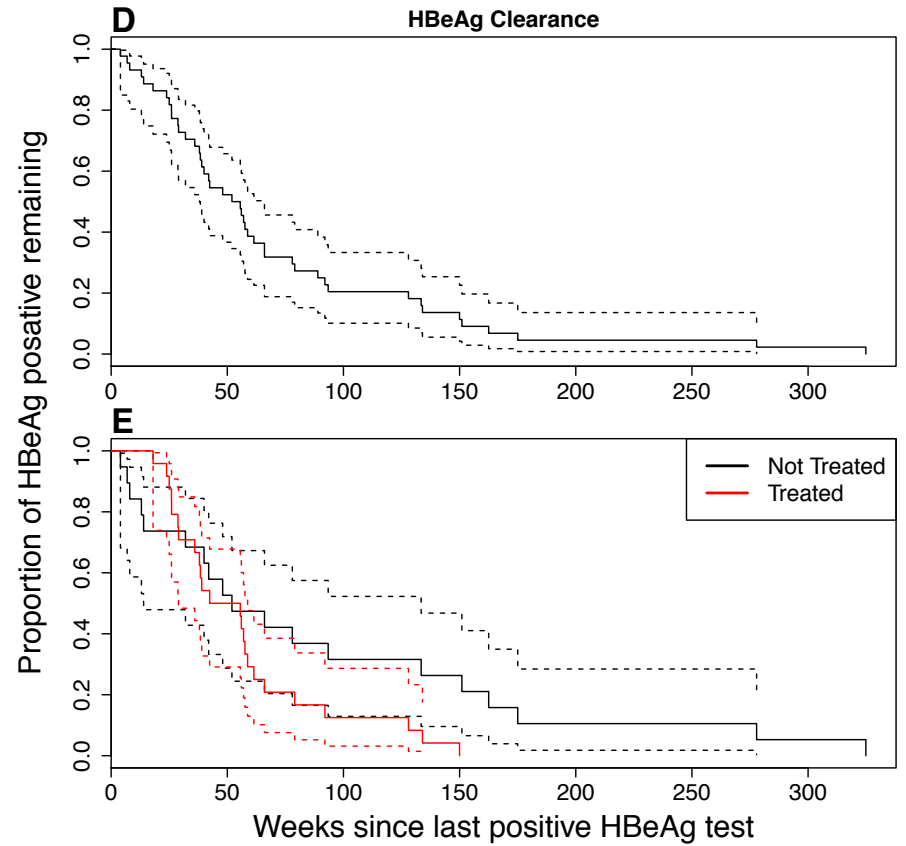

**F**

| Time (weeks)             | All cases of HBeAg clearance (n=43)§ | Untreated cases (n=19) | Treated cases (n=24) |
|--------------------------|--------------------------------------|------------------------|----------------------|
| Median                   | 54                                   | 52                     | 49                   |
| 95% Confidence Intervals | 38 – 66                              | 14 – 133               | 29 - 59              |

Fig 5

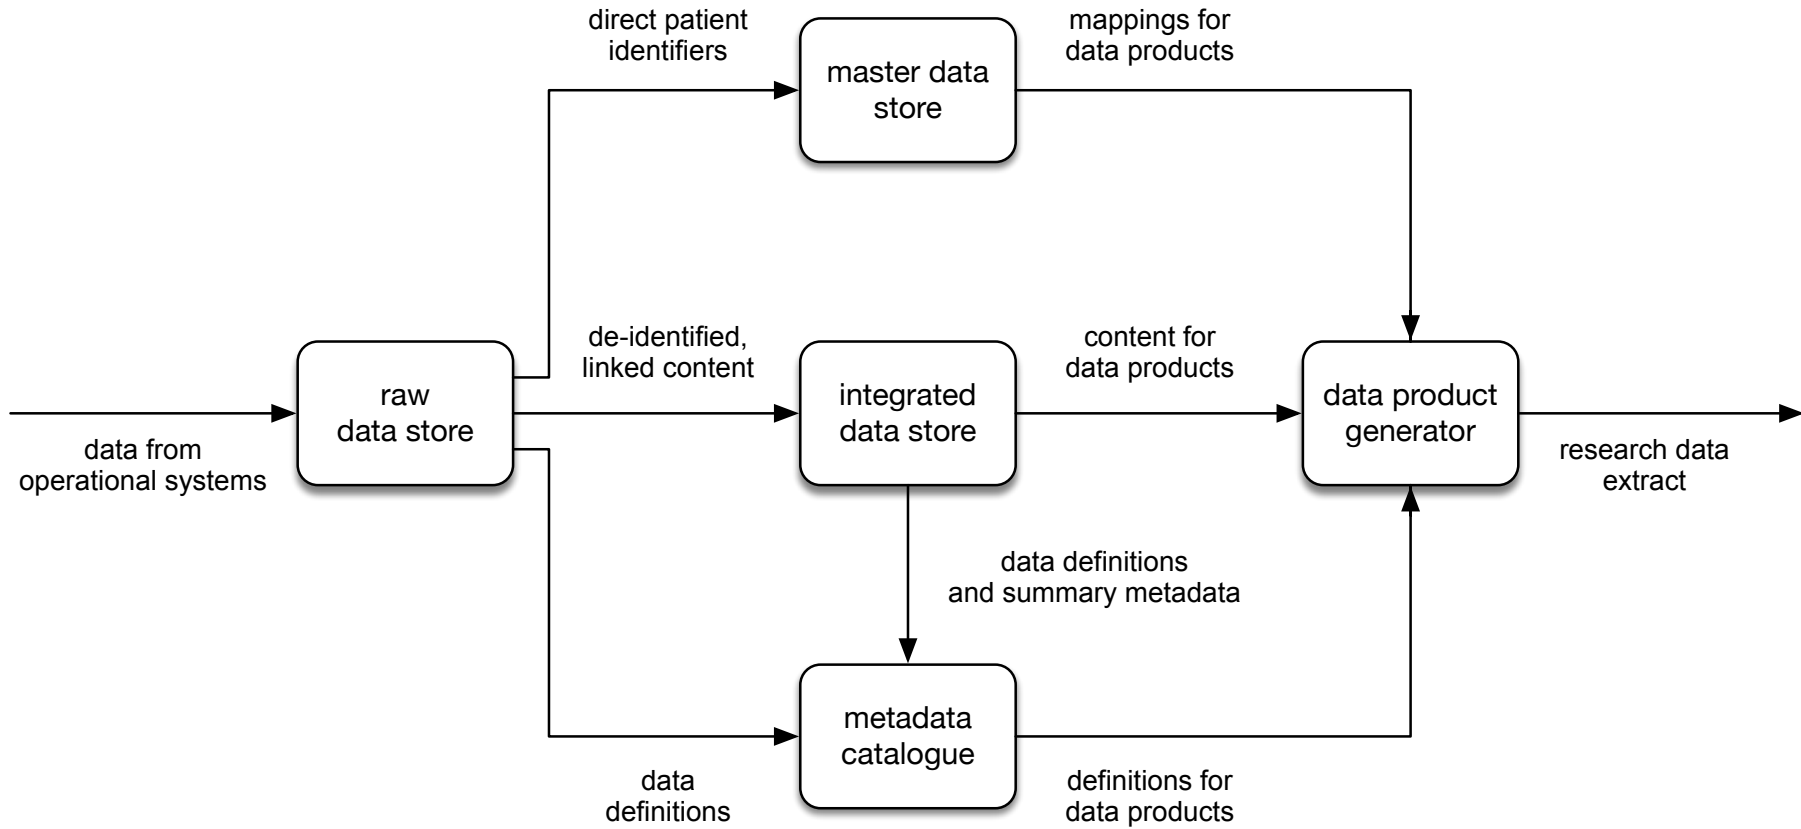

Source: https://biorxiv.org/content/biorxiv/early/2018/12/13/494500.full-text.pdf
